# Supplementary material for: Ionic Liquids as Surfactants for Layered Double Hydroxide Fillers: Effect on the Final Properties of Poly(Butylene Adipate-Co-Terephthalate)
Source: PubMed Central journal article supplement (PMC5666462; doi:10.3390/nano7100297), 2017-09-28
Supplement: nanomaterials-07-00297-s001.pdf [file nanomaterials-07-00297-s001.pdf]

# Ionic Liquids as Surfactants for Layered Double Hydroxide Fillers: Effect on the Final Properties of Poly(Butylene Adipate-Co-Terephthalate)

Sébastien Livi <sup>1,\*</sup>, Luanda Chaves Lins <sup>1,\*</sup>, Jakub Peter <sup>2</sup>, Hynek Benes <sup>2</sup>, Jana Kredatusova <sup>2</sup>, Ricardo K. Donato <sup>3</sup> and Sébastien Pruvost <sup>1</sup>

<sup>1</sup> IMP Ingénierie des Matériaux Polymères, UMR CNRS 5223, INSA Lyon, Université de Lyon, F-69621 Villeurbanne, France

<sup>2</sup> Institute of Macromolecular Chemistry AS CR, v.v.i., Heyrovsky Sq. 2, 162 06 Prague 6, Czech Republic; peter@imc.cas.cz (J.P.); benesh@imc.cas.cz (H.B.); kredatusova@imc.cas.cz (J.K.)

<sup>3</sup> MackGraphe—Graphene and Nanomaterials Research Center, Mackenzie Presbyterian University, Rua da Consolação 896, São Paulo 01302-907, Brazil; ricardo.donato@mackenzie.br

\* Correspondence: sebastien.livi@insa-lyon.fr (S.L.); Tel.: +33-472-438-291 (S.L.); luandaqmc@gmail.com (L.C.L.)

Table S1: Dependence of gas and water vapor diffusion coefficients in poly(butylene adipate-co-terephthalate) (PBAT) polymer materials containing different amount of pristine and organically treated- layered double hydroxides (LDHs)

| Material          | Diffusion coefficient $D \times 10^{12}$ (m <sup>2</sup> /s) |                |                |                 |                  | Diffusivity selectivity        |                                  |                                |                                 |                                 |
|-------------------|--------------------------------------------------------------|----------------|----------------|-----------------|------------------|--------------------------------|----------------------------------|--------------------------------|---------------------------------|---------------------------------|
|                   | H <sub>2</sub>                                               | O <sub>2</sub> | N <sub>2</sub> | CO <sub>2</sub> | H <sub>2</sub> O | H <sub>2</sub> /N <sub>2</sub> | O <sub>2</sub> /H <sub>2</sub> O | O <sub>2</sub> /N <sub>2</sub> | H <sub>2</sub> /CO <sub>2</sub> | CO <sub>2</sub> /N <sub>2</sub> |
| PBAT              | 360                                                          | 34             | 17             | 11.3            | 5.7              | 21.5                           | 6.0                              | 2.1                            | 31.9                            | 0.7                             |
| PBAT-LDH 5%       | 310                                                          | 34             | 25             | 11.3            | 4.1              | 12.3                           | 8.4                              | 1.4                            | 27.5                            | 0.4                             |
| PBAT-LDH 10%      | 300                                                          | 27             | 25             | 9.0             | 3.5              | 11.9                           | 7.7                              | 1.1                            | 33.4                            | 0.4                             |
| PBAT/LDH-349 5 %  | -                                                            | 26             | 17             | 9.0             | 3.3              | -                              | 7.9                              | 1.5                            | -                               | 0.5                             |
| PBAT/LDH-104 5 %  | -                                                            | 24             | 19             | 7.8             | 2.3              | -                              | 10.3                             | 1.3                            | -                               | 0.4                             |
| PBAT/LDH-349 10 % | 320                                                          | 28             | 14             | 10.8            | 2.2              | 0.0                            | 12.7                             | 0.0                            | 0.7                             | 0.0                             |
| PBAT/LDH-351 10 % | 328                                                          | 30             | 16             | 10.0            | 2.6              | 20.8                           | 11.7                             | 1.9                            | 32.7                            | 0.6                             |
| PBAT/LDH-104 10 % | 303                                                          | 28             | 28             | 9.5             | 2.1              | 11.0                           | 13.6                             | 1.0                            | 31.8                            | 0.3                             |

Table S2: Dependence of gas and water vapor solubility coefficients in PBAT polymer materials containing different amount of pristine and organically treated-LDHs

| Material          | Solubility coefficient $S \times 10^6$ (mol.m <sup>3</sup> /Pa) |                |                |                 |                  | Solubility selectivity         |                                 |                                |                                 |                                 |
|-------------------|-----------------------------------------------------------------|----------------|----------------|-----------------|------------------|--------------------------------|---------------------------------|--------------------------------|---------------------------------|---------------------------------|
|                   | H <sub>2</sub>                                                  | O <sub>2</sub> | N <sub>2</sub> | CO <sub>2</sub> | H <sub>2</sub> O | H <sub>2</sub> /N <sub>2</sub> | H <sub>2</sub> O/O <sub>2</sub> | O <sub>2</sub> /N <sub>2</sub> | CO <sub>2</sub> /H <sub>2</sub> | CO <sub>2</sub> /N <sub>2</sub> |
| PBAT              | 4.6                                                             | 11.9           | 6.54           | 372             | 153 000          | 0.7                            | 12900                           | 1.8                            | 81.2                            | 56.9                            |
| PBAT-LDH 5%       | 4.9                                                             | 10.1           | 4.06           | 329             | 162 000          | 1.2                            | 16100                           | 2.5                            | 67.0                            | 80.9                            |
| PBAT-LDH 10%      | 4.9                                                             | 11.9           | 4.06           | 373             | 212 000          | 1.2                            | 17800                           | 2.9                            | 76.2                            | 91.9                            |
| PBAT/LDH-349 5 %  | -                                                               | 12.4           | 5.82           | 369             | 169 000          | -                              | 13700                           | 2.1                            | -                               | 63.5                            |
| PBAT/LDH-104 5 %  | -                                                               | 13.2           | 4.85           | 407             | 199 000          | -                              | 15200                           | 2.7                            | -                               | 83.8                            |
| PBAT/LDH-349 10 % | 5.2                                                             | 13.0           | 8.16           | 365             | 214 000          | 0.6                            | 16600                           | 1.6                            | 69.9                            | 44.7                            |
| PBAT/LDH-351 10 % | 4.3                                                             | 11.1           | 5.90           | 338             | 197 000          | 0.7                            | 17800                           | 1.9                            | 78.6                            | 57.2                            |
| PBAT/LDH-104 10 % | 4.7                                                             | 12.6           | 3.95           | 367             | 280 000          | 1.2                            | 22300                           | 3.2                            | 77.5                            | 93.0                            |
